# Supplementary material for: Broad-spectrum Molecular Detection of Zoonotic Agents in Wild Micromammals: A Nationwide Surveillance Study in the Republic of Korea
Source: Research Square preprint supplement (doi:10.21203/rs.3.rs-8535840/v1), 2026-01-14
Supplement: Supplementary file 1 [file 8029fbe78d378950fa2a1934.docx]

**Supplementary Table S1.** Pathogen panel included in the TAC assay for simultaneous detection. The table lists pathogens assigned to each port in the left and right columns.

| Port | | 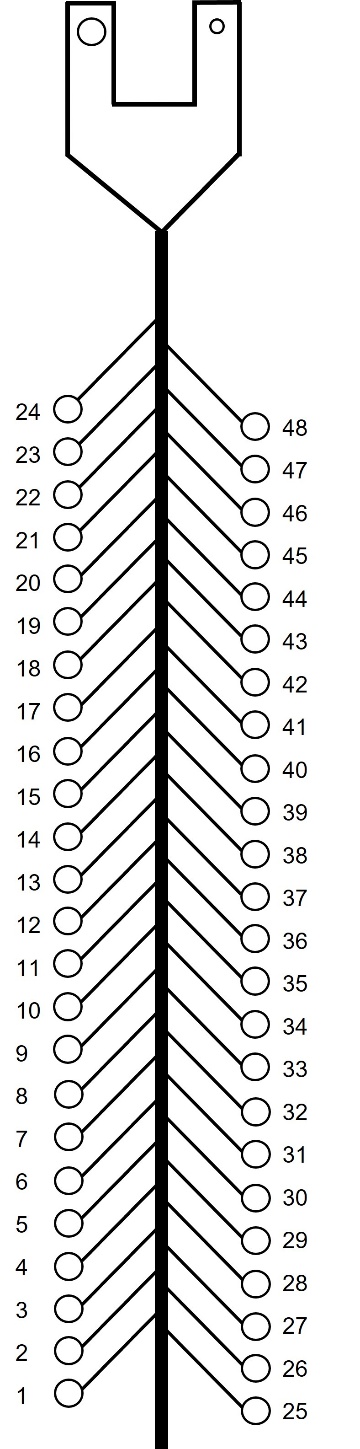 | Port | |
| --- | --- | --- | --- | --- |
| Left | | Right | |
| 24 | *Rickettsia Prowazeki* | GAPDH | 48 |
| 23 | *Rickettsia typhi* | *B. atrophaeus,* Xeno | 47 |
| 22 | *Rickettsia* spp. | *Entamoeba histolytica* | 46 |
| 21 | *Borrelia* spp. | *Angiostrongylus cantonensis* | 45 |
| 20 | *Rickettsia tsutsugamushi* AKA *Orientia tsutsugamushi* | *Capillaria hepatica* | 44 |
| 19 | *Ehrlichia* spp. | *Brachylaima* spp. | 43 |
| 18 | *Anaplasma* spp. | *Fasciola* spp. | 42 |
| 17 | Cowpox virus | *Schistosoma* spp. | 41 |
| 16 | Colorado tick fever virus | *Echinococcus* spp. | 40 |
| 15 | Junin virus AKA Argentinian mammarenavirus | *Hydatigera taeniaeformis* | 39 |
| 14 | Powassan virus | *Giardia* spp. | 38 |
| 13 | Borna disease virus | *Cryptosporidium* | 37 |
| 12 | Songling virus | *Trichinella* spp. | 36 |
| 11 | 18s rRNA | *Toxoplasma gondii* | 35 |
| 10 | Tacheng tick virus | *Leishmania* | 34 |
| 9 | Kyasanur Forest disease virus | *Trypanosoma* spp. | 33 |
| 8 | Lassa virus AKA Lassa mammarenavirus | *Theileria* spp. | 32 |
| 7 | Omsk Hemorrhagic Fever virus | *Babesia* spp. | 31 |
| 6 | Hepatitis E virus | *Yersinia pestis* | 30 |
| 5 | Lymphocytic choriomeningitis mammarenavirus | *Streprococus moniliformis* | 29 |
| 4 | Crimean-Congo hemorrhagic fever virus | *Leptospira* | 28 |
| 3 | Tick-borne encephalitis virus | *Franciscella tularensis* | 27 |
| 2 | Hantavirus | *Coxiella burnetii* | 26 |
| 1 | Severe Fever with Thrombocytopenia Syndrome Bunyavirus | *Bartonella* spp. | 25 |

**Supplementary Table S2.** Primer sets used for conventional PCR confirmation of viral and bacterial pathogens.

| Pathogen | Target gene | Primer name | Sequence (5' → 3') | Size  (bp) | Ref. |
| --- | --- | --- | --- | --- | --- |
| Junin virus | S segment | JUNV 247F | TCACAGCGTCACTCTTCCTTC | 346 | Thermo Fisher Scientific |
| JUNV 620R | AGTCAGTGCTAGATGGGAAGC |
| JUNV 418F | GGCGTAGAGGACACTAAGACC | 371 |
| JUNV 789R | ACATCTGAACAAGCCAGGCA |
| L gene | LVL-3359D/G | AGAATYAGTGAAAGGGARAGYAATTC | 396 | [50] |
| LVL-3754A/D | CACATCATTGGTCCCCATTTACTRTGATC |
| Lymphocytic choriomeningitis virus | S segment | 1817V-LCM | AIATGATGCAGTCCATGAGTGCACA | 660 | [51] |
| 2477C-LCM | TCAGGTGAAGGRTGGCCATACAT |
| 1902V-LCM | CCAGCCATATTTGTCCCACACTTT | 445 |
| 2346C-LCM | AGCAGCAGGYCCRCCTCAGGT |
| S segment | LCMV-1638F | TGGAGAGTCAGGGAGGCC | 650 | [52] |
| LCMV-1010C | TCNGGNGARGGNTGGCC |
| LCMV-1696 | ATNATGCARTCCATRAGWGCACA |
| GP  (S segment) | LCMV-001 | CGCACCGGGGATCCTAGGCTT | 907 | [53] |
| LCMV-R1 | TCGTAGCATGTCACAG |
| LCMV-DM1 | GAATTCTATCCAGTAAAAGGATGG |
| LCMV-RC1 | GAGCTCTGCAGCAAGGATCATCC |
| NP  (S segment) | LCMV-2818 | GATGAATTCTTCACATCCAAACCC | 207 |
| LCMV-3060 | GATCCGAATTCTACATCAAAG |
| LCMV-NP5'Ⅰ | TACTACACCACTTGCACCCTG |
| LCMV-NP3'Ⅰ | TCTGAAAGTGGGAAGACTTAG |
| *Bartonella* spp. | 16s rRNA | A-proteo | AGAGTTTGATMCTGGCTCAGA | 1210 | [54] |
| r-Alpha-sh | GTAGCACGTGTGTAGCCCA |
| Bart | CACTCTTTTAGAGTGAGCGGCAA | 990 |
| r-BH | CCCCCTAGAGTGCCCAACCA |
| *Ehrlichia* spp. | 16s rRNA | AE1-F | AAGCTTAACACATGCAAGTCGAA | 1406 | [55] |
| AE1-R | AGTCACTGACCCAACCTTAAATG |
| HE1 | CAATTGCTTATAACCTTTTGGTTATAAAT | 390 |
| HE3 | TATAGGTACCGTCATTATCTTCCCTAT |
| *Anaplasma* spp. | 16s rRNA | AE1-F | AAGCTTAACACATGCAAGTCGAA | 1406 | [55] |
| AE1-R | AGTCACTGACCCAACCTTAAATG |
| EE3 | GTCGAACGGATTATTCTTTATAGCTTGC | 926 | [56, 57] |
| EE4 | CCCTTCCGTTAAGAAGGATCTAATCTCC |
| *Borrelia* spp. | *flaB* | BflaPAD | GATCARGCWCAAYATAACCAWATGCA | 451 | [58, 59] |
| BflaPDU | AGATTCAAGTCTGTTTTGGAAAGC |
| BflaPBU | GCTGAAGAGCTTGGAATGCAACC | 347 |
| BflaPCR | TGATCAGTTATCATTCTAATAGCA |
| *Orientia tsutsugamushi* | 56-kDa *tsa* | First F | GCAATATTGCTAGTGCAATGTCTGC | 475 | [29] |
| First R | ATGCATGCATGRCGCTKCAATTTA |
| Second F | ATAGGCCTATAAGTATWGCKGATCG |
| Second R | CATCTAGAYGCACTATTAGGCAAA |
| *Rickettsia* spp. | *gltA* | CS-78 | GCA AGT ATC GGT GAG GAT GTA AT | 381  -401 | [60] |
| CS-323 | GCT TCC TTA AAA TTC AAT AAA TCA GGA T |
| *Leptotpira* spp. | *rpoB* | *rpoB-1889F* | GTTCCAACATGCAACGYCAR | 1649 | [61] |
| *rpoB-3537R* | GTTGAAGGATTCRGGRATAC |
| *rpoB-2438F* | TYATGCCKTGGGAAGGWTAC | 1023 |
| *rpoB-3460R* | GCATRTCRTCKGACTTGATG |
| *lipL32* | hap1-435F | GGGAATACGTAGAMGTTCG | 1435 | [61] |
| hap1-1870R | GTTTATAGTAGGTTGAAGCTTG |
| L-hap1-217F | CCGTGATTTTCCTAACTAAGG | 848 | [62] |
| L-hap1-218R | CAGATTACTTAGTCGCGTCAGA |
| *gyrB* | LeptoB2F | TGAGCCAAGAAGAAACAAGCTACA | 500 | [63] |
| LeptoB504R | MATGGTTCCRCTTTCCGAAGA |
